# Supplementary material for: bc-GenExMiner 3.0: new mining module computes breast cancer gene expression correlation analyses
Source: PubMed Central journal article supplement — Database (Oxford). 2013 Jan 15;2013:bas060. doi: 10.1093/database/bas060 (PMC3548333; doi:10.1093/database/bas060), 2013-01-15

### **bc-GenExMiner 3.0: new mining module computes breast cancer gene-expression correlation analyses**

Pascal Jézéquel, Jean-Sébastien Frénel, Loïc Campion, Catherine Guérin-Charbonnel, Wilfried Gouraud, Gabriel Ricolleau, Mario Campone

Supplementary Method:

#### **Multi-correlation score (MCS) calculation (eigenvalue decomposition)**

Given a matrix  $M$ , an eigenvalue is a scalar  $\lambda$  such that  $Mu = \lambda u$  for some non-zero vector  $u$ , which is called an eigenvector. As the correlation matrix  $C$  of a given set of genes is diagonalizable, we can find a matrix  $U$  of linearly independent eigenvectors such that  $C = U\Lambda U^{-1}$ , where  $U$  is the matrix of eigenvectors and  $\Lambda$  is a diagonal matrix whose diagonal elements are the different eigenvalues. Each eigenvalue is equal to the variance explained by the corresponding eigenvector. As the eigenvectors are linearly independent, taking the largest eigenvalue permits to quantify the variance that is the most important within the data, and when divided by the sum of all eigenvalues and multiply by 100 to get the multi-correlation score, to know the proportion of this “information” compared to the whole “information” contained in the data.

**Supplementary Table 1** Screening of continuous clusters of correlated ( $r \geq 0.30$  and  $p \leq 0.05$ ) co-expressed genes ( $n \geq 3$ ) based on Bunes results as input genes by means of bc-GenExMiner v3.0 gene expression correlation analysis by chromosomal location [15]

| N <sup>oa</sup>  | Cytoband  | Molecular subtype | bc-GenExMiner continuous cluster of correlated co-expressed genes |                                                                                  | MCS <sup>b</sup> (%) |
|------------------|-----------|-------------------|-------------------------------------------------------------------|----------------------------------------------------------------------------------|----------------------|
|                  |           |                   | No.                                                               | genes                                                                            |                      |
| 1                | 17q12-q21 | All patients      | 7                                                                 | <i>STARD3, TCAP, PNMT, PGAP3, ERBB2, C17orf37, GRB7</i>                          | 59.84                |
|                  |           | All patients      | 3                                                                 | <i>FBXL20, MED1, CDK12</i>                                                       | 78.06                |
|                  |           | HER2              |                                                                   |                                                                                  | 83.53                |
|                  |           | luminal A         |                                                                   |                                                                                  | 60.34                |
|                  |           | luminal B         |                                                                   |                                                                                  | 68.43                |
|                  |           | All patients      | 7                                                                 | <i>MED24, THRA, NR1D1, MSL1, CASC3, RAPGEFL1, WIPF2</i>                          | 54.33                |
|                  |           | HER2              |                                                                   |                                                                                  | 59.97                |
|                  |           | HER2              | 8                                                                 | <i>MED24, THRA, NR1D1, MSL1, CASC3, RAPGEFL1, WIPF2, CDC6</i>                    | 58.05                |
|                  |           | All patients      | 7                                                                 | <i>SOCS7, ARHGAP23, SRCINI, C17orf96, MLLT6, CISD3, PCGF2</i>                    | 58.11                |
|                  |           | HER2              | 5                                                                 | <i>SRCINI, C17orf96, MLLT6, CISD3, PCGF2</i>                                     | 76.67                |
|                  |           | Luminal B         | 3                                                                 | <i>LOC100287808, PSMB3, PIP4K2B</i>                                              | 71.99                |
|                  |           | All patients      | 3                                                                 | <i>PSMB3, PIP4K2B, CWC25</i>                                                     | 70.52                |
|                  |           | HER2              |                                                                   |                                                                                  | 90.65                |
|                  |           | Luminal B         | 3                                                                 | <i>SYNRG, DDX52, HNF1B</i>                                                       | 60.89                |
|                  |           | All patients      | 4                                                                 | <i>TADA2A, DUSP14, SYNRG, DDX52</i>                                              | 56.36                |
|                  |           | HER2              |                                                                   |                                                                                  | 68.94                |
|                  |           | Luminal B         | 3                                                                 | <i>ARL4D, DHX8, RPL19</i>                                                        | 62.50                |
|                  |           | All patients      | 3                                                                 | <i>GSDMB, ORMDL3, PSMD3</i>                                                      | 71.50                |
|                  |           | HER2              |                                                                   |                                                                                  | 68.85                |
|                  |           | 2                 | 17q11-q12                                                         | All patients                                                                     | 6                    |
| HER2             |           |                   |                                                                   |                                                                                  | 80.20                |
| Basal-like       | 4         |                   |                                                                   | <i>TRAF4, C17orf63, ERAL1, FLOT2</i>                                             | 53.87                |
| Luminal B        |           |                   |                                                                   |                                                                                  | 70.20                |
| Luminal A        | 3         |                   |                                                                   | <i>ERAL1, FLOT2, DHRS13</i>                                                      | 61.04                |
| All patients     | 5         |                   |                                                                   | <i>SPAG5, SGK494, KIAA0100, SDF2, SUPT6H</i>                                     | 58.85                |
| Basal-like       | 3         |                   |                                                                   | <i>KIAA0100, SDF2, SUPT6H</i>                                                    | 69.66                |
| HER2             |           |                   |                                                                   |                                                                                  | 90.45                |
| Luminal B        |           |                   |                                                                   |                                                                                  | 68.79                |
| All patients     | 5         |                   |                                                                   | <i>TMEM97, IFT20, TNFAIP1, POLDIP2, TMEM199</i>                                  | 61.17                |
| Basal-like       |           |                   |                                                                   |                                                                                  | 55.78                |
| HER2             | 4         |                   |                                                                   | <i>TMEM97, IFT20, TNFAIP1, POLDIP2</i>                                           | 81.07                |
| Luminal B        | 4         |                   |                                                                   | <i>IFT20, TNFAIP1, POLDIP2, TMEM199</i>                                          | 66.58                |
| Basal-like, HER2 | 3         |                   |                                                                   | <i>BLMH, CPD, GOSR1</i>                                                          | 56.55                |
| All patients     | 3         |                   |                                                                   | <i>TMEM199, SARM1, SLC46A1</i>                                                   | 68.42                |
| HER2             |           |                   |                                                                   |                                                                                  | 58.26                |
| 3                | 8q24      |                   |                                                                   | All patients                                                                     | 7                    |
|                  |           | basal-like        |                                                                   |                                                                                  | 64.15                |
|                  |           | HER2              | 4                                                                 | <i>FBXL6, GPR172A, ADCK5, CPSF1</i>                                              | 70.30                |
|                  |           | Luminal A         |                                                                   |                                                                                  | 50.46                |
|                  |           | Luminal B         |                                                                   |                                                                                  | 72.15                |
|                  |           | HER2              | 4                                                                 | <i>CPSF1, SLC39A4, VPS28, CYHR1</i>                                              | 61.90                |
|                  |           | All patients      | 7                                                                 | <i>GRINA, OPLAH, EXOSC4, GPAAL, CYC1, SHARPIN, MAF1</i>                          | 59.64                |
|                  |           | Luminal B         |                                                                   |                                                                                  | 78.04                |
|                  |           | Basal-like        | 6                                                                 | <i>GRINA, OPLAH, EXOSC4, GPAAL, CYC1, SHARPIN</i>                                | 61.34                |
|                  |           | HER2              | 5                                                                 | <i>EXOSC4, GPAAL, CYC1, SHARPIN, MAF1</i>                                        | 68.28                |
|                  |           | Luminal A         | 4                                                                 | <i>EXOSC4, GPAAL, CYC1, SHARPIN</i>                                              | 59.72                |
|                  |           | All patients      | 5                                                                 | <i>ZNF707, MAPK15, FAM83H, SCRIB, PUF60</i>                                      | 59.48                |
|                  |           | Basal-like        | 4                                                                 | <i>FAM83H, SCRIB, PUF60, NRBP2</i>                                               | 65.45                |
|                  |           | HER2              | 3                                                                 | <i>FAM83H, SCRIB, PUF60</i>                                                      | 77.83                |
|                  |           | Luminal A         |                                                                   |                                                                                  | 65.77                |
|                  |           | Luminal B         | 5                                                                 | <i>FAM83H, SCRIB, PUF60, NRBP2, PLEC</i>                                         | 68.82                |
|                  |           | All patients      | 5                                                                 | <i>MFSD3, RECQL4, LRRC14, C8orf82, ARHGAP39</i>                                  | 57.25                |
|                  |           | Basal-like        | 3                                                                 | <i>RECQL4, LRRC14, C8orf82</i>                                                   | 60.14                |
|                  |           | Luminal B         | 4                                                                 | <i>RECQL4, LRRC14, C8orf82, ARHGAP39</i>                                         | 68.71                |
|                  |           | All patients      | 10                                                                | <i>C8orf51, RHPN1, ZC3H3, GSDMD, C8orf73, NAPRT1, EEF1D, TIGD5, PYCRL, TSTA3</i> | 49.02                |
|                  |           | Basal-like        | 4                                                                 | <i>EEF1D, TIGD5, PYCRL, TSTA3</i>                                                | 55.80                |
|                  |           | Luminal B         | 4                                                                 | <i>TIGD5, PYCRL, TSTA3, ZNF623</i>                                               | 64.65                |
|                  |           | All patients      | 7                                                                 | <i>ZNF517, ZNF7, COMMD5, ZNF250, ZNF16, ZNF252, C8orf33</i>                      | 56.16                |
|                  |           | Basal-like        | 6                                                                 | <i>ZNF7, COMMD5, ZNF250, ZNF16, ZNF252, C8orf33</i>                              | 63.65                |
|                  |           | HER2              | 4                                                                 | <i>ZNF7, COMMD5, ZNF250, ZNF16</i>                                               | 73.41                |
|                  |           | Luminal B         |                                                                   |                                                                                  | 79.67                |
|                  |           | Luminal A         | 3                                                                 | <i>COMMD5, ZNF250, ZNF16</i>                                                     | 56.09                |

|              |           |                                               |           |                                                                                        |       |                                           |       |
|--------------|-----------|-----------------------------------------------|-----------|----------------------------------------------------------------------------------------|-------|-------------------------------------------|-------|
| 4            | 6p21      | All patients                                  | 10        | <i>MAPK15, FAM83H, SCRIB, PUF60, NRBP2, PLEC, PARP10, GRINA, OPLAH, EXOSC4</i>         | 54.45 |                                           |       |
|              |           | Basal-like                                    | 6         | <i>GRINA, OPLAH, EXOSC4, GPAAI, CYC1, SHARPIN</i>                                      | 61.34 |                                           |       |
|              |           | HER2                                          | 5         | <i>EXOSC4, GPAAI, CYC1, SHARPIN, MAF1</i>                                              | 68.28 |                                           |       |
|              |           | Luminal A                                     | 4         | <i>EXOSC4, GPAAI, CYC1, SHARPIN</i>                                                    | 59.72 |                                           |       |
|              |           | Luminal B                                     | 7         | <i>GRINA, OPLAH, EXOSC4, GPAAI, CYC1, SHARPIN, MAF1</i>                                | 78.04 |                                           |       |
|              |           | All patients                                  | 4         | <i>HLA-DOB, TAP2, PSMB8, TAP1</i>                                                      | 59.93 |                                           |       |
|              |           | Basal-like                                    | 9         | <i>HLA-DOB, TAP2, PSMB8, TAP1, HLA-DRB1, PSMB9, HLA-DQB1, HLA-DMB, HLA-DMA</i>         | 68.48 |                                           |       |
|              |           | All patients                                  | 7         | <i>PSMB8, TAP1, HLA-DRB1, PSMB9, HLA-DQB1, HLA-DMB, HLA-DMA</i>                        | 65.73 |                                           |       |
|              |           | HER2                                          |           |                                                                                        | 66.42 |                                           |       |
|              |           | Luminal B                                     | 5         | <i>PSMB8, TAP1, HLA-DRB1, PSMB9, HLA-DQB1</i>                                          | 65.77 |                                           |       |
| Basal-like   | 4         | <i>HLA-DRA, HLA-DQA1, HLA-DRB6, HLA-DOB</i>   | 60.39     |                                                                                        |       |                                           |       |
| All patients | 4         | <i>HLA-DQB2, HLA-DPA1, HLA-DPB1, HLA-DPB2</i> | 60.91     |                                                                                        |       |                                           |       |
| Basal-like   | 3         | <i>HLA-DQB2, HLA-DPA1, HLA-DPB1</i>           | 63.85     |                                                                                        |       |                                           |       |
| HER2         |           |                                               | 68.96     |                                                                                        |       |                                           |       |
| Luminal B    | 4         | <i>HLA-DOA, HLA-DQB2, HLA-DPA1, HLA-DPB1</i>  | 61.76     |                                                                                        |       |                                           |       |
| All patients | 3         | <i>HLA-DOA, HLA-DQB2, HLA-DPA1</i>            | 59.30     |                                                                                        |       |                                           |       |
| All patients | 3         | <i>HSD17B8, RING1, VPS52</i>                  | 58.70     |                                                                                        |       |                                           |       |
| All patients | 4         | <i>PRICKLE4, USP49, MED20, BYSL</i>           | 52.47     |                                                                                        |       |                                           |       |
| 5            | 17q24-q25 | All patients                                  | 7         | <i>SUMO2, NUP85, GGA3, MRPS7, MIF4GD, SLC25A19, GRB2</i>                               | 53.47 |                                           |       |
|              |           | Basal-like                                    | 3         | <i>NUP85, GGA3, MRPS7</i>                                                              | 61.04 |                                           |       |
|              |           | HER2                                          | 12        | <i>CDR2L, ICT1, ATP5H, KCTD2, SLC16A5, ARMC7, NT5C, HNI, SUMO2, NUP85, GGA3, MRPS7</i> | 74.89 |                                           |       |
|              |           | Luminal B                                     | 3         | <i>NUP85, GGA3, MRPS7</i>                                                              | 68.95 |                                           |       |
|              |           | HER2                                          | 4         | <i>SAP30BP, ITGB4, GALK1, H3F3B</i>                                                    | 67.43 |                                           |       |
|              |           | All patients                                  | 4         | <i>ARL16, HGS, MRPL12, SLC25A10</i>                                                    | 65.17 |                                           |       |
|              |           | Basal-like                                    |           |                                                                                        | 62.98 |                                           |       |
|              |           | HER2                                          | 3         | <i>HGS, MRPL12, SLC25A10</i>                                                           | 73.10 |                                           |       |
|              |           | Luminal A                                     |           |                                                                                        | 58.43 |                                           |       |
|              |           | Luminal B                                     |           |                                                                                        | 69.81 |                                           |       |
|              |           | All patients                                  | 5         | <i>ARMC7, NT5C, HNI, SUMO2, NUP85</i>                                                  | 53.89 |                                           |       |
|              |           | Basal-like                                    | 3         | <i>HNI, SUMO2, NUP85</i>                                                               | 71.29 |                                           |       |
|              |           | HER2                                          | 10        | <i>C17orf28, CDR2L, ICT1, ATP5H, KCTD2, SLC16A5, ARMC7, NT5C, HNI, SUMO2</i>           | 76.06 |                                           |       |
|              |           | HER2                                          | 4         | <i>SAP30BP, ITGB4, GALK1, H3F3B</i>                                                    | 67.43 |                                           |       |
|              |           | All patients                                  | 3         | <i>SIRT7, PCYT2, MAFG</i>                                                              | 63.88 |                                           |       |
|              |           | HER2                                          |           |                                                                                        | 66.05 |                                           |       |
|              |           | Basal-like                                    | 4         | <i>SIRT7, PCYT2, MAFG, PYCR1</i>                                                       | 55.43 |                                           |       |
|              |           | All patients                                  | 8         | <i>ASPSCR1, STRA13, LRRC45, RAC3, DCXR, RFNG, GPSI, DUS1L</i>                          | 55.40 |                                           |       |
|              |           | Basal-like                                    | 5         | <i>ASPSCR1, STRA13, LRRC45, RAC3, DCXR</i>                                             | 57.41 |                                           |       |
|              |           | HER2                                          |           |                                                                                        | 71.89 |                                           |       |
|              |           | All patients                                  | 4         | <i>KIAA0195, CASKIN2, TSEN54, LLGL2</i>                                                | 58.62 |                                           |       |
|              |           | HER2                                          | 6         | <i>SLC25A19, GRB2, KIAA0195, CASKIN2, TSEN54, LLGL2</i>                                | 69.04 |                                           |       |
|              |           | Luminal B                                     | 4         | <i>SLC25A19, GRB2, KIAA0195, CASKIN2</i>                                               | 58.89 |                                           |       |
|              |           | Basal-like                                    | 3         | <i>CASKIN2, TSEN54, LLGL2</i>                                                          | 56.87 |                                           |       |
|              |           | HER2                                          | 3         | <i>RECQL5, SAP30BP, ITGB4</i>                                                          | 67.00 |                                           |       |
|              |           | Basal-like                                    | 4         | <i>LLGL2, MYO15B, RECQL5, SAP30BP</i>                                                  | 36.39 |                                           |       |
|              |           | All patients                                  | 4         | <i>ARL16, HGS, MRPL12, SLC25A10</i>                                                    | 65.17 |                                           |       |
|              |           | Basal-like                                    |           |                                                                                        | 62.98 |                                           |       |
|              |           | All patients                                  | 4         | <i>P4HB, ARHGDI1, ANAPC11, THOC4</i>                                                   | 58.47 |                                           |       |
|              |           | Basal-like                                    |           |                                                                                        | 67.44 |                                           |       |
|              |           | HER2                                          |           |                                                                                        | 66.34 |                                           |       |
|              |           | Luminal B                                     |           |                                                                                        | 67.01 |                                           |       |
|              |           | 6                                             | 11q12-q13 | All patients                                                                           | 3     | <i>MRPL49, SYVN1, CAPN1</i>               | 61.39 |
|              |           |                                               |           | All patients                                                                           | 3     | <i>DPF2, TIGD3, SLC25A45</i>              | 57.45 |
|              |           |                                               |           | HER2                                                                                   | 3     | <i>POLA2, CDC42EP2, DPF2</i>              | 61.86 |
|              |           |                                               |           | All patients                                                                           | 5     | <i>MAP3K11, PCNXL3, SIPA1, RELA, KAT5</i> | 49.49 |
| Luminal B    | 3         |                                               |           | <i>SCYL1, LTBP3, SSSCA1</i>                                                            | 65.63 |                                           |       |
| HER2         | 3         |                                               |           | <i>PACSI, EEFIG, TUT1</i>                                                              | 56.61 |                                           |       |
| All patients | 5         |                                               |           | <i>KLC2, RAB1B, CNIH2, YIF1A, TMEM151A</i>                                             | 51.89 |                                           |       |
| All patients | 3         |                                               |           | <i>ADAM15, EFNA4, EFNA3</i>                                                            | 55.87 |                                           |       |
| 7            | 1q21-q22  | HER2                                          |           |                                                                                        | 57.33 |                                           |       |
|              |           | Basal-like                                    | 3         | <i>DCST2, DCST1, ADAM15</i>                                                            | 77.24 |                                           |       |
|              |           | HER2                                          | 4         | <i>PYGO2, SHC1, CKS1B, FLAD1</i>                                                       | 62.77 |                                           |       |
|              |           | Luminal B                                     | 3         | <i>SHC1, CKS1B, FLAD1</i>                                                              | 56.03 |                                           |       |
|              |           | All patients                                  | 4         | <i>FAM189B, SCAMP3, CLK2, HCN3</i>                                                     | 53.88 |                                           |       |
|              |           | Basal-like                                    | 3         | <i>FAM189B, SCAMP3, CLK2</i>                                                           | 61.79 |                                           |       |
|              |           | HER2                                          |           |                                                                                        | 70.37 |                                           |       |
|              |           | Luminal B                                     |           |                                                                                        | 57.88 |                                           |       |
|              |           | Luminal A                                     | 4         | <i>GBA, FAM189B, SCAMP3, CLK2</i>                                                      | 59.26 |                                           |       |
|              |           | All patients                                  | 4         | <i>MSTO1, YY1API, DAP3, GON4L</i>                                                      | 56.76 |                                           |       |

|    |           |              |   |                                                                   |       |
|----|-----------|--------------|---|-------------------------------------------------------------------|-------|
|    |           | Luminal A    |   |                                                                   | 60.28 |
|    |           | Basal-like   | 3 | <i>MSTO1, YY1API, DAP3</i>                                        | 61.02 |
|    |           | HER2         | 3 | <i>YY1API, DAP3, GON4L</i>                                        | 62.06 |
|    |           | HER2         | 3 | <i>EFNA1, DPM3, KRTCAP2</i>                                       | 75.10 |
|    |           | Luminal B    | 3 | <i>EFNA4, EFNA3, EFNA1</i>                                        | 60.82 |
|    |           | All patients | 3 | <i>FDPS, C1orf104, RUSC1</i>                                      | 62.80 |
|    |           | All patients | 4 | <i>PMVK, PBXIP1, PYGO2, SHC1</i>                                  | 53.01 |
|    |           | HER2         |   |                                                                   | 63.50 |
|    |           | All patients | 4 | <i>PSMD4, ZNF687, PI4KB, RFX5</i>                                 | 55.46 |
|    |           | Basal-like   | 3 | <i>PSMD4, ZNF687, PI4KB</i>                                       | 65.80 |
|    |           | Luminal A    |   |                                                                   | 62.74 |
|    |           | HER2         | 4 | <i>VPS72, PIP5K1A, PSMD4, ZNF687</i>                              | 61.68 |
|    |           | All patients | 4 | <i>POGZ, CGN, TUFT1, SNX27</i>                                    | 54.66 |
|    |           | HER2         | 3 | <i>POGZ, CGN, TUFT1</i>                                           | 60.47 |
|    |           | Luminal A    |   |                                                                   | 57.96 |
| 8  | 17q21-q23 | All patients | 6 | <i>DHX40, CLTC, PTRH2, TMEM49, TUBD1, RPS6KB1</i>                 | 57.10 |
|    |           | Basal-like   | 3 | <i>CLTC, PTRH2, TMEM49</i>                                        | 67.49 |
|    |           | HER2         | 8 | <i>DHX40, CLTC, PTRH2, TMEM49, TUBD1, RPS6KB1, RNFT1, HEATR6</i>  | 63.26 |
|    |           | Luminal B    | 3 | <i>DHX40, CLTC, PTRH2</i>                                         | 67.75 |
|    |           | HER2         | 7 | <i>CLTC, PTRH2, TMEM49, TUBD1, RPS6KB1, RNFT1, HEATR6</i>         | 65.25 |
|    |           | Luminal B    | 4 | <i>TUBD1, RPS6KB1, RNFT1, HEATR6</i>                              | 64.25 |
|    |           | All patients | 6 | <i>DHX40, CLTC, PTRH2, TMEM49, TUBD1, RPS6KB1</i>                 | 57.10 |
|    |           | HER2         | 3 | <i>ACSF2, CHAD, RSAD1</i>                                         | 68.80 |
|    |           | HER2         | 4 | <i>TOB1, SPAG9, NME1, NME1-NME2</i>                               | 80.08 |
| 9  | 10p11-p12 | All patients | 5 | <i>UPF2, DHTKD1, SEC61A2, NUDT5, CDC123</i>                       | 54.49 |
|    |           | Luminal B    | 4 | <i>DHTKD1, SEC61A2, NUDT5, CDC123</i>                             | 70.75 |
|    |           | Basal-like   | 3 | <i>RPP38, NMT2, FAM171A1</i>                                      | 63.28 |
|    |           | All patients | 3 | <i>SEPHS1, BEND7, PRPF18</i>                                      | 58.75 |
|    |           | Basal-like   |   |                                                                   | 59.21 |
|    |           | All patients |   | <i>UPF2, DHTKD1, SEC61A2, NUDT5, CDC123</i>                       | 54.49 |
|    |           | Basal-like   | 3 | <i>UPF2, DHTKD1, SEC61A2</i>                                      | 56.64 |
|    |           | Basal-like   | 3 | <i>HSPA14, SUV39H2, DCLRE1C</i>                                   | 61.03 |
|    |           | Luminal B    |   |                                                                   | 59.58 |
|    |           | HER2         | 3 | <i>FAM188A, PTER, RSU1</i>                                        | 60.35 |
| 10 | 19q13     | All patients | 7 | <i>ZNF579, FIZ1, ZNF524, ZNF784, ZNF580, ZNF581, CCDC106</i>      | 55.38 |
|    |           | Basal-like   | 3 | <i>TMEM190, RPL28, UBE2S</i>                                      | 67.80 |
|    |           | All patients | 5 | <i>UBE2S, SHISA7, ISOC2, ZNF628, NAT14</i>                        | 52.11 |
|    |           | All patients | 5 | <i>ZNF416, ZIK1, ZNF530, ZNF134, ZNF211</i>                       | 52.07 |
|    |           | Luminal B    | 3 | <i>ZNF530, ZNF134, ZNF211</i>                                     | 64.13 |
|    |           | All patients | 3 | <i>ZNF135, ZSCAN18, ZNF329</i>                                    | 64.68 |
|    |           | Basal-like   |   |                                                                   | 68.76 |
|    |           | HER2         |   |                                                                   | 63.09 |
|    |           | Luminal A    |   |                                                                   | 66.84 |
|    |           | Luminal B    |   |                                                                   | 64.25 |
|    |           | All patients | 4 | <i>ZSCAN18, ZNF329, ZNF274, ZNF544</i>                            | 53.90 |
|    |           | Basal-like   | 3 | <i>ZSCAN18, ZNF329, ZNF274</i>                                    | 62.66 |
|    |           | Luminal B    | 3 | <i>ZNF132, KIR2DS3, KIR2DS2</i>                                   | 52.62 |
|    |           | Basal-like   | 3 | <i>ZBTB45, TRIM28, CHMP2A</i>                                     | 65.47 |
|    |           | Luminal B    |   |                                                                   | 68.11 |
| 11 | 16p13     | All patients | 3 | <i>SNHG9, NTHL1, TSC2</i>                                         | 61.31 |
|    |           | All patients | 3 | <i>SLC9A3R2, SNHG9, NTHL1</i>                                     | 60.39 |
|    |           | All patients | 3 | <i>NME4, DECR2, RAB11FIP3</i>                                     | 62.89 |
|    |           | Luminal A    |   |                                                                   | 58.69 |
|    |           | Basal-like   | 3 | <i>DECR2, RAB11FIP3, SOLH</i>                                     | 54.33 |
|    |           | All patients | 4 | <i>RAB11FIP3, SOLH, PIGO, RAB40C</i>                              | 51.38 |
|    |           | Luminal A    | 3 | <i>SOLH, PIGO, RAB40C</i>                                         | 61.04 |
|    |           | All patients | 8 | <i>FAM195A, WDR90, RHOT2, RHBDL1, STUB1, JMJD8, WDR24, FBXL16</i> | 55.12 |
|    |           | Basal-like   | 3 | <i>FAM195A, WDR90, RHOT2</i>                                      | 67.21 |
|    |           | Luminal A    |   |                                                                   | 65.90 |
|    |           | Luminal B    | 3 | <i>RHOT2, RHBDL1, STUB1</i>                                       | 67.55 |
|    |           | All patients | 3 | <i>CCDC154, CLCN7, TELO2</i>                                      | 65.70 |
|    |           | All patients | 3 | <i>SNHG9, NTHL1, TSC2</i>                                         | 61.31 |
| 12 | 8p11-q13  | All patients | 5 | <i>LSM1, BAG4, DDHD2, PPAPDC1B, WHSC1L1</i>                       | 64.14 |
|    |           | Basal-like   |   |                                                                   | 63.11 |
|    |           | HER2         |   |                                                                   | 71.50 |
|    |           | Luminal B    |   |                                                                   | 86.70 |
|    |           | All patients | 3 | <i>FGFR1, TACCI, PLEKHA2</i>                                      | 56.21 |
|    |           | All patients | 3 | <i>GTF2E2, GSR, UBXN8</i>                                         | 58.00 |
|    |           | HER2         | 4 | <i>GTF2E2, GSR, UBXN8, PPP2CB</i>                                 | 56.09 |
|    |           | Luminal B    | 7 | <i>LEPROTL1, DCTN6, RBPMS, GTF2E2, GSR, UBXN8, PPP2CB</i>         | 66.10 |
| 13 | 19p13     | All patients | 5 | <i>GCDH, SYCE2, FARSA, CALR, RAD23A</i>                           | 53.34 |
|    |           | Basal-like   | 4 | <i>FARSA, CALR, RAD23A, GADD45GIP1</i>                            | 59.02 |

|    |           |              |   |                                                               |       |
|----|-----------|--------------|---|---------------------------------------------------------------|-------|
|    |           | Luminal B    |   |                                                               | 57.17 |
|    |           | Luminal A    | 3 | <i>FARSA, CALR, RAD23A</i>                                    | 62.97 |
|    |           | All patients | 4 | <i>FDX1L, RAVER1, ICAM3, TYK2</i>                             | 56.36 |
|    |           | All patients | 5 | <i>CARM1, YIPF2, C19orf52, SMARCA4, LOC147727</i>             | 51.63 |
|    |           | Basal-like   | 4 | <i>CARM1, YIPF2, C19orf52, SMARCA4</i>                        | 59.77 |
|    |           | HER2         | 3 | <i>TMED1, CARM1, YIPF2</i>                                    | 55.65 |
|    |           | Luminal B    |   |                                                               | 64.19 |
|    |           | All patients | 4 | <i>DHPS, FBXW9, TNPO2, C19orf43</i>                           | 59.03 |
|    |           | Basal-like   | 3 | <i>WDR83, DHPS, FBXW9</i>                                     | 71.77 |
| 14 | 1q42-q44  | All patients | 4 | <i>NUP133, ABCB10, TAF5L, URB2</i>                            | 54.39 |
|    |           | Basal-like   |   |                                                               | 59.05 |
|    |           | All patients | 3 | <i>TBCE, B3GALNT2, FAM72A</i>                                 | 67.48 |
|    |           | Basal-like   |   |                                                               | 62.60 |
|    |           | HER2         | 3 | <i>GGPS1, TBCE, B3GALNT2</i>                                  | 60.64 |
|    |           | Luminal B    |   |                                                               | 70.81 |
|    |           | All patients | 4 | <i>ARF1, C1orf35, MRPL55, GUK1</i>                            | 58.40 |
|    |           | Basal-like   |   |                                                               | 57.22 |
|    |           | All patients | 3 | <i>RHOU, RAB4A, C1orf96</i>                                   | 57.49 |
|    |           | Luminal A    |   |                                                               | 62.57 |
|    |           | All patients | 6 | <i>C1orf131, GNPAT, EXOC8, C1orf124, EGLN1, TSNAX</i>         | 55.14 |
|    |           | Basal-like   | 4 | <i>C1orf131, GNPAT, EXOC8, C1orf124</i>                       | 68.04 |
|    |           | Luminal B    |   |                                                               | 71.47 |
|    |           | Luminal A    | 5 | <i>C1orf131, GNPAT, EXOC8, C1orf124, EGLN1</i>                | 57.94 |
| 15 | 16q11-q13 | All patients | 6 | <i>MT1A, MT1B, MT1F, MT1G, MT1H, MT1X</i>                     | 62.75 |
|    |           | Luminal A    |   |                                                               | 76.39 |
|    |           | Basal-like   | 8 | <i>MT2A, MT1M, MT1A, MT1B, MT1F, MT1G, MT1H, MT1X</i>         | 70.68 |
|    |           | HER2         | 3 | <i>MT1F, MT1G, MT1H</i>                                       | 77.14 |
|    |           | Luminal B    | 4 | <i>MT1F, MT1G, MT1H, MT1X</i>                                 | 71.87 |
|    |           | All patients | 3 | <i>MT1H, MT1X, NUP93</i>                                      | 64.71 |
|    |           | Luminal A    | 3 | <i>NUDT21, OGFOD1, BBS2</i>                                   | 64.44 |
|    |           | Luminal B    |   |                                                               | 75.91 |
|    |           | All patients | 4 | <i>CPNE2, FAM192A, RSPRY1, ARL2BP</i>                         | 53.95 |
|    |           | Luminal B    | 3 | <i>FAM192A, RSPRY1, ARL2BP</i>                                | 76.68 |
| 16 | 16q21-q24 | All patients | 5 | <i>NOB1, WWP2, PDPR, EXOSC6, AARS</i>                         | 49.87 |
|    |           | All patients | 4 | <i>FUK, COG4, SF3B3, IL34</i>                                 | 58.44 |
|    |           | Basal-like   | 3 | <i>FUK, COG4, SF3B3</i>                                       | 61.58 |
|    |           | Luminal A    |   |                                                               | 63.03 |
|    |           | Luminal B    |   |                                                               | 65.08 |
|    |           | All patients | 3 | <i>VPS4A, NIP7, TMED6</i>                                     | 57.13 |
|    |           | All patients | 7 | <i>RLTPR, ACD, PARD6A, C16orf48, C16orf86, GFOD2, RANBP10</i> | 51.69 |
|    |           | Basal-like   | 3 | <i>THAP11, NUTF2, EDC4</i>                                    | 57.63 |
|    |           | Luminal B    |   |                                                               | 64.69 |
|    |           | All patients | 3 | <i>DDX28, DUS2L, NFATC3</i>                                   | 57.94 |
| 17 | 6p21-p22  | All patients | 4 | <i>BTN3A2, BTN2A2, BTN3A1, BTN3A3</i>                         | 63.22 |
|    |           | Basal-like   |   |                                                               | 74.94 |
|    |           | HER2         |   |                                                               | 65.95 |
|    |           | Luminal A    |   |                                                               | 55.79 |
|    |           | Luminal A    | 3 | <i>BTN3A2, BTN2A2, BTN3A1</i>                                 | 62.75 |
|    |           | All patients | 6 | <i>C6orf136, DHX16, KIAA1949, NRM, MDC1, TUBB</i>             | 55.39 |
|    |           | Basal-like   | 3 | <i>MRPS18B, C6orf136, DHX16</i>                               | 72.44 |
|    |           | HER2         | 3 | <i>HIST1H2BD, HIST1H2BE, HIST1H4D</i>                         | 68.75 |
|    |           | All patients | 3 | <i>HIST1H3D, HIST1H2AD, HIST1H2BF</i>                         | 67.40 |
|    |           | Basal-like   |   |                                                               | 73.73 |
|    |           | Luminal A    |   |                                                               | 74.45 |
|    |           | Luminal B    |   |                                                               | 74.40 |
|    |           | All patients | 5 | <i>HIST1H2AD, HIST1H2BF, HIST1H4E, HIST1H2BG, HIST1H2AE</i>   | 65.05 |
|    |           | HER2         |   |                                                               | 67.52 |
|    |           | Basal-like   | 4 | <i>HIST1H2AD, HIST1H2BF, HIST1H4E, HIST1H2BG</i>              | 64.89 |
|    |           | HER2         | 3 | <i>HIST1H2BG, HIST1H2AE, HIST1H3E</i>                         | 68.63 |
|    |           | All patients | 4 | <i>HIST1H2BH, HIST1H3G, HIST1H2BI, HIST1H4H</i>               | 64.34 |
|    |           | Basal-like   |   |                                                               | 60.20 |
|    |           | HER2         |   |                                                               | 69.29 |
|    |           | Luminal A    |   |                                                               | 60.81 |
| 18 | 11q13-q14 | All patients | 4 | <i>NDUFC2, ALG8, KCTD21, LOC100287896</i>                     | 65.37 |
|    |           | Luminal B    | 3 | <i>NDUFC2, ALG8, KCTD21</i>                                   | 85.43 |
|    |           | All patients | 5 | <i>PAK1, AQP11, CLNS1A, RSF1, C11orf67</i>                    | 64.33 |
|    |           | Luminal B    |   |                                                               | 74.46 |
|    |           | HER2         | 3 | <i>CLNS1A, RSF1, C11orf67</i>                                 | 84.24 |
|    |           | Luminal A    |   |                                                               | 62.95 |
|    |           | All patients | 3 | <i>USP35, GAB2, NARS2</i>                                     | 67.11 |
|    |           | Luminal A    |   |                                                               | 59.57 |
|    |           | Luminal B    |   |                                                               | 81.35 |

|              |           |              |           |                                                                 |       |                              |       |
|--------------|-----------|--------------|-----------|-----------------------------------------------------------------|-------|------------------------------|-------|
|              |           | Luminal A    | 3         | <i>PRCP, C11orf82, RAB30</i>                                    | 47.99 |                              |       |
|              |           | All patients | 3         | <i>OR7E126P, MAP6, MOGAT2</i>                                   | 60.79 |                              |       |
| 19           | 1p32-p35  | All patients | 3         | <i>IPO13, ATP6V0B, B4GALT2</i>                                  | 58.45 |                              |       |
|              |           | Basal-like   | 4         | <i>DPH2, IPO13, ATP6V0B, B4GALT2</i>                            | 53.90 |                              |       |
|              |           | Basal-like   | 3         | <i>EIF2B3, HECTD3, UROD</i>                                     | 56.72 |                              |       |
|              |           | HER2         | 3         | <i>PRDX1, AKR1A1, NASP</i>                                      | 61.19 |                              |       |
|              |           | All patients | 3         | <i>DMAP1, ERI3, RNF220</i>                                      | 59.11 |                              |       |
|              |           | Basal-like   |           |                                                                 | 61.91 |                              |       |
|              |           | Luminal B    |           |                                                                 | 62.15 |                              |       |
|              |           | All patients | 3         | <i>INPP5B, LOC100128093, SF3A3</i>                              | 59.11 |                              |       |
| 20           | 19q13     | All patients | 4         | <i>SCAF1, IRF3, BCL2L12, PRMT1</i>                              | 57.03 |                              |       |
|              |           | Basal-like   | 3         | <i>IRF3, BCL2L12, PRMT1</i>                                     | 66.60 |                              |       |
|              |           | Luminal B    |           |                                                                 | 77.90 |                              |       |
|              |           | All patients | 3         | <i>NOSIP, PRRG2, PRR12</i>                                      | 58.27 |                              |       |
|              |           | Luminal B    |           |                                                                 | 65.38 |                              |       |
|              |           | All patients | 5         | <i>MED25, DKFZP434J0226, PTOV1, PNKP, AKT1S1</i>                | 54.13 |                              |       |
|              |           | Luminal A    | 3         | <i>DKFZp434J0226, PTOV1, PNKP</i>                               | 61.32 |                              |       |
|              |           | Luminal B    | 3         | <i>PTOV1, PNKP, AKT1S1</i>                                      | 70.23 |                              |       |
|              |           | Luminal B    | 3         | <i>YRK3, ZNF473, MYH14</i>                                      | 71.39 |                              |       |
|              |           | 21           | 19q13     | All patients                                                    | 3     | <i>ZNF383, HKR1, ZNF527</i>  | 61.05 |
| All patients | 3         |              |           | <i>WDR87, SIPA1L3, DPF1</i>                                     | 59.42 |                              |       |
| All patients | 3         |              |           | <i>PSMD8, GGN, FAM98C</i>                                       | 58.38 |                              |       |
| HER2         | 3         |              |           | <i>ACTN4, CAPN12, LGALS7</i>                                    | 68.01 |                              |       |
| 22           | 3p21      | Luminal B    | 3         | <i>GPX1, RHOA, TCTA</i>                                         | 55.52 |                              |       |
|              |           | All patients | 7         | <i>P4HTM, WDR6, DALRD3, NDUFAF3, IMPDH2, QRICHI, QARS</i>       | 50.05 |                              |       |
|              |           | HER2         | 3         | <i>IMPDH2, QRICHI, QARS</i>                                     | 62.24 |                              |       |
|              |           | All patients | 3         | <i>QARS, USP19, LAMB2</i>                                       | 58.44 |                              |       |
| 23           | 16p11-p13 | All patient  | 3         | <i>BCKDK, MYST1, PRSS8</i>                                      | 63.11 |                              |       |
|              |           | Luminal A    |           |                                                                 | 72.57 |                              |       |
|              |           | Luminal B    |           |                                                                 | 68.34 |                              |       |
|              |           | Luminal A    | 3         | <i>FUS, PYCARD, PYDC1</i>                                       | 65.44 |                              |       |
|              |           | All patients | 3         | <i>FBXL19, ORA13, SETD1A</i>                                    | 65.50 |                              |       |
|              |           | All patients | 7         | <i>PRR14, FBRS, SRCAP, PHKG2, C16orf93, RNF40, ZNF629</i>       | 54.88 |                              |       |
|              |           | Luminal A    | 4         | <i>PRR14, FBRS, SRCAP, PHKG2</i>                                | 63.22 |                              |       |
|              |           | Luminal A    | 4         | <i>PHKG2, C16orf93, RNF40, ZNF629</i>                           | 61.39 |                              |       |
|              |           | Luminal B    | 3         | <i>PRR14, FBRS, SRCAP</i>                                       | 65.51 |                              |       |
|              |           | All patients | 5         | <i>BOLA2, SULT1A3, LOC595101, CD2BP2, TBC1D10B</i>              | 51.47 |                              |       |
|              |           | All patients | 5         | <i>ZNF768, ZNF747, ZNF764, ZNF688, ZNF785</i>                   | 55.52 |                              |       |
|              |           | 24           | 14q13-q21 | Luminal B                                                       | 3     | <i>KLHDC2, SDCCAG1, ARF6</i> | 60.88 |
|              |           |              |           | All patients                                                    | 3     | <i>SOS2, L2HGDH, ATP5S</i>   | 54.12 |
| All patients | 3         |              |           | <i>RPL36AL, MGAT2, C14orf104</i>                                | 57.30 |                              |       |
| HER2         |           |              |           |                                                                 | 56.13 |                              |       |
| Basal-like   | 3         |              |           | <i>PPIL5, RPL36AL, MGAT2</i>                                    | 61.89 |                              |       |
| All patients | 3         |              |           | <i>MAP4K5, AT1L1, SAV1</i>                                      | 60.16 |                              |       |
| All patient  | 3         |              |           | <i>FAM179B, PRPF39, FKBP3</i>                                   | 60.88 |                              |       |
| Basal-like   |           |              |           |                                                                 | 59.81 |                              |       |
| Luminal B    |           |              |           |                                                                 | 65.65 |                              |       |
| Luminal B    | 3         |              |           | <i>KLHL28, FAM179B, PRPF39</i>                                  | 72.22 |                              |       |
| 25           | 12q13-q15 | HER2         | 3         | <i>YEATS4, FRS2, CCT2</i>                                       | 66.61 |                              |       |
|              |           | Luminal B    |           |                                                                 | 73.98 |                              |       |
|              |           | All patients | 4         | <i>MDM1, RAP1B, NUP107, SLC35E3</i>                             | 57.47 |                              |       |
|              |           | HER2         |           |                                                                 | 75.43 |                              |       |
|              |           | Luminal A    | 3         | <i>MDM1, RAP1B, NUP107</i>                                      | 58.61 |                              |       |
|              |           | All patients | 3         | <i>NUP107, SLC35E3, MDM2</i>                                    | 57.57 |                              |       |
|              |           | HER2         | 4         | <i>RAP1B, NUP107, SLC35E3, MDM2</i>                             | 66.94 |                              |       |
|              |           | Luminal B    |           |                                                                 | 75.13 |                              |       |
| 26           | 6q16-q21  | All patients | 7         | <i>ATG5, AIM1, RTN4IP1, QRSL1, C6orf203, BEND3, PDSS2</i>       | 51.52 |                              |       |
|              |           | Basal-like   | 4         | <i>ATG5, AIM1, RTN4IP1, QRSL1</i>                               | 59.51 |                              |       |
|              |           | HER2         | 4         | <i>AIM1, RTN4IP1, QRSL1, C6orf203</i>                           | 69.08 |                              |       |
|              |           | Luminal B    | 3         | <i>ATG5, AIM1, RTN4IP1</i>                                      | 69.82 |                              |       |
|              |           | Luminal A    | 3         | <i>RTN4IP1, QRSL1, C6orf203</i>                                 | 57.74 |                              |       |
|              |           | HER2         | 3         | <i>SMPD2, MICAL1, ZBTB24</i>                                    | 62.37 |                              |       |
|              |           | Luminal B    |           |                                                                 | 71.04 |                              |       |
|              |           | Luminal B    | 3         | <i>WASF1, CDC40, DDO</i>                                        | 57.97 |                              |       |
|              |           | All patients | 6         | <i>RAD54B, KIAA1429, ESRP1, DPY19L4, INTS8, CCNE2</i>           | 57.87 |                              |       |
| 27           | 8q21-23   | Basal-like   | 3         | <i>RAD54B, KIAA1429, ESRP1</i>                                  | 65.96 |                              |       |
|              |           | Basal-like   | 4         | <i>KIAA1429, ESRP1, DPY19L4, INTS8</i>                          | 55.24 |                              |       |
|              |           | Luminal B    |           |                                                                 | 72.40 |                              |       |
|              |           | HER2         | 5         | <i>RAD54B, KIAA1429, ESRP1, DPY19L4, INTS8</i>                  | 68.10 |                              |       |
|              |           | HER2         | 7         | <i>ESRP1, DPY19L4, INTS8, CCNE2, TP53INP1, C8orf38, PLEKHF2</i> | 61.95 |                              |       |
|              |           | All patients | 3         | <i>UQCRB, MTERFD1, PTDSSI</i>                                   | 67.67 |                              |       |
|              |           | Basal-like   |           |                                                                 | 69.88 |                              |       |

|    |           |              |   |                                           |       |
|----|-----------|--------------|---|-------------------------------------------|-------|
|    |           | HER2         |   |                                           | 72.53 |
|    |           | Luminal A    |   |                                           | 56.98 |
|    |           | Luminal B    |   |                                           | 74.31 |
|    |           | Luminal A    | 3 | <i>SDC2, PGCP, TSPYL5</i>                 | 60.86 |
|    |           | Luminal B    | 4 | <i>MTERFD1, PTDSSI, SDC2, PGCP</i>        | 64.49 |
|    |           | Basal-like   | 3 | <i>TSPYL5, MTDH, LAPTM4B</i>              | 59.82 |
|    |           | Luminal B    | 3 | <i>MTDH, LAPTM4B, MATN2</i>               | 60.76 |
|    |           | All patients | 3 | <i>FBXO43, POLR2K, SPAG1</i>              | 56.99 |
|    |           | HER2         | 4 | <i>POLR2K, SPAG1, RNF19A, ANKRD46</i>     | 63.19 |
| 28 | 3q26-q27  | All patients | 3 | <i>DVL3, AP2MI, ABCF3</i>                 | 54.60 |
|    |           | Basal-like   | 4 | <i>EIF2B5, DVL3, AP2MI, ABCF3</i>         | 52.75 |
|    |           | Basal-like   | 3 | <i>PSMD2, EIF4G1, FAM131A</i>             | 63.68 |
|    |           | Luminal B    |   |                                           | 62.97 |
| 29 | 11p11-p13 | Basal-like   | 3 | <i>APIP, PDHX, CD44</i>                   | 66.50 |
|    |           | Luminal B    | 3 | <i>FJX1, TRIM44, LDLRAD3</i>              | 69.21 |
|    |           | Luminal B    | 3 | <i>CAPRINI, NAT10, ABTB2</i>              | 62.31 |
|    |           | Basal-like   | 3 | <i>TRIM44, LDLRAD3, COMMD9</i>            | 63.38 |
|    |           | Luminal B    |   |                                           | 65.13 |
| 30 | 19p11-p13 | All patients | 5 | <i>LASS1, COPE, DDX49, HOMER3, ARMC6</i>  | 51.35 |
|    |           | Basal-like   | 4 | <i>COPE, DDX49, HOMER3, ARMC6</i>         | 59.16 |
|    |           | All patients | 3 | <i>TMEM161A, RFXANK, NR2C2AP</i>          | 67.26 |
|    |           | Basal-like   |   |                                           | 77.37 |
|    |           | Luminal A    |   |                                           | 56.15 |
|    |           | All patients | 3 | <i>C19orf50, UBA52, C19orf60</i>          | 59.75 |
| 31 | 20q13     | All patients | 4 | <i>OSBPL2, ADRM1, LAMA5, LOC100287547</i> | 53.01 |
|    |           | HER2         | 3 | <i>OSBPL2, ADRM1, LAMA5</i>               | 57.59 |
|    |           | Luminal B    | 3 | <i>SYCP2, PPP1R3D, C20orf177</i>          | 68.54 |
|    |           | All patients | 3 | <i>TCFL5, DIDO1, C20orf11</i>             | 61.26 |
|    |           | Luminal B    |   |                                           | 62.65 |
| 32 | 9q33-q34  | Luminal B    | 3 | <i>GAPVD1, MAPKAP1, PBX3</i>              | 56.09 |
|    |           | HER2         | 3 | <i>LMX1B, ZBTB43, ZBTB34</i>              | 82.42 |
|    |           | All patients | 3 | <i>TTC16, TOR2A, SH2D3C</i>               | 56.53 |

a: Bunes order of frequency; b: multi-correlation score

**Supplementary Table 2** Screening of continuous clusters of correlated ( $r \geq 0.30$  and  $p \leq 0.05$ ) co-expressed genes ( $n \geq 2$ ) according to ER status of genes overexpressed in gained regions based on Han's results as input genes by means of bc-GenExMiner v3.0 gene expression correlation analysis by chromosomal location [21]

| Cytoband        | Input gene                                         | Test results                                                       |                                                                  |                                         | ER- specificity |
|-----------------|----------------------------------------------------|--------------------------------------------------------------------|------------------------------------------------------------------|-----------------------------------------|-----------------|
|                 |                                                    | ER <sup>-</sup> cluster                                            | ER <sup>+</sup> cluster                                          | Basal-like cluster                      |                 |
| 9p24.3-p21.1    | <i>KANK1</i>                                       | <i>KANK1, DMRT1, DMRT3, DMRT2</i><br><b>MCS<sup>p</sup> = 46.7</b> | <i>DOCK8, KANK1, DMRT1, DMRT3, DMRT2</i><br><b>MCS = 52.5</b>    | No cluster                              | Discordant      |
|                 | <i>KIAA0020</i>                                    | Discontinuous                                                      |                                                                  | Discontinuous                           | Tendency        |
|                 | <i>RCL1</i>                                        | <i>PPAPDC2, CDC37LI, AK3, RCL1, JAK2</i><br><b>MCS = 55.3</b>      | <i>PPAPDC2, CDC37LI, AK3, RCL1</i><br><b>MCS = 54</b>            | <i>PPAPDC2, CDC37LI, AK3, RCL1</i>      | Yes             |
|                 | <i>UHRF2</i>                                       | No cluster                                                         | No cluster                                                       | Discontinuous                           | No              |
|                 | <i>GLDC</i>                                        | No cluster                                                         | No cluster                                                       | No cluster                              | No              |
|                 | <i>KDM4C</i>                                       | No cluster                                                         | No cluster                                                       | Discontinuous                           | No              |
|                 | <i>C9orf123</i>                                    | Discontinuous                                                      |                                                                  | Discontinuous                           | Tendency        |
|                 | <i>NFIB</i>                                        | <i>MPDZ, NFIB, ZDHHC21</i><br><b>MCS = 58.8</b>                    | <i>MPDZ, NFIB</i><br><b>MCS = 57.8</b>                           | <i>MPDZ, NFIB, ZDHHC21</i>              | Yes             |
|                 | <i>PSIP1</i>                                       | <i>TTC39B, SNAPC3, PSIP1, C9orf93</i><br><b>MCS = 60.4</b>         | <i>TTC39B, SNAPC3, PSIP1, C9orf93</i><br><b>MCS = 61</b>         | <i>TTC39B, SNAPC3, PSIP1</i>            | Discordant      |
|                 | <i>PLIN2</i>                                       | No cluster                                                         | No cluster                                                       | No cluster                              | No              |
|                 | <i>RPS6</i>                                        | No cluster                                                         | No cluster                                                       | No cluster                              | No              |
|                 | <i>MTAP</i>                                        | No cluster                                                         | No cluster                                                       | No cluster                              | No              |
|                 | <i>PLAA</i>                                        | <i>TUSC1, C9orf82, PLAA</i><br><b>MCS = 66.7</b>                   | <i>TUSC1, C9orf82, PLAA</i><br><b>MCS = 62.7</b>                 | <i>TUSC1, C9orf82, PLAA</i>             | Yes             |
|                 | <i>MOBK2B</i>                                      | <i>C9orf11, MOBK2B, IFNK</i><br><b>MCS = 63.1</b>                  | <i>C9orf11, MOBK2B</i><br><b>MCS = 56.8</b>                      | No cluster                              | Yes             |
|                 | <i>CNTLN</i>                                       | No cluster                                                         | No cluster                                                       | No cluster                              | No              |
| <i>HAUS6</i>    | Discontinuous                                      |                                                                    | Discontinuous                                                    | Tendency                                |                 |
| <i>CDKN2A</i>   | <i>CDKN2A, CDKN2B</i><br><b>MCS = 52.4</b>         | <i>CDKN2A, CDKN2B, DMRTA1</i><br><b>MCS = 54.1</b>                 | <i>CDKN2A, CDKN2B</i>                                            | Discordant                              |                 |
| 10p15.3-p14     | <i>GTPBP4</i>                                      | <i>LARP4B, GTPBP4, IDI2</i><br><b>MCS = 52</b>                     | <i>LARP4B, GTPBP4, IDI2, IDI1</i><br><b>MCS = 54.7</b>           | <i>LARP4B, GTPBP4, IDI2</i>             | Discordant      |
|                 | <i>PFKP</i>                                        | Discontinuous                                                      |                                                                  |                                         | Tendency        |
|                 | <i>IL15RA</i>                                      | <i>IL15RA, IL2RA</i><br><b>MCS = 49.7</b>                          | <i>ANKRD16, FBXO18, IL15RA, IL2RA</i><br><b>MCS = 50.2</b>       | <i>IL15RA, IL2RA</i>                    | Discordant      |
|                 | <i>RBM17</i>                                       | No cluster                                                         | No cluster                                                       | No cluster                              | No              |
|                 | <i>CELF2</i>                                       | No cluster<br><b>MCS = 64</b>                                      | <i>SFTA1P, LOC254312, CELF2</i><br><b>MCS = 59</b>               | No cluster                              | Yes             |
|                 | <i>NUDT5</i>                                       | <i>UPF2, DHTKD1, SEC61A2, NUDT5, CDC123</i><br><b>MCS = 55.6</b>   | <i>UPF2, DHTKD1, SEC61A2, NUDT5, CDC123</i><br><b>MCS = 53.6</b> | Discontinuous                           | Yes             |
|                 | <i>IDI1</i>                                        | No cluster<br><b>MCS = 52</b>                                      | <i>LARP4B, GTPBP4, IDI2, IDI1</i><br><b>MCS = 54.7</b>           | No cluster                              | Discordant      |
|                 | <i>WDR37</i>                                       | No cluster                                                         | No cluster                                                       | No cluster                              | No              |
|                 | <i>CALML5</i>                                      | No cluster                                                         | No cluster                                                       | No cluster                              | No              |
|                 | <i>GDI2</i>                                        | <i>C10orf18, GDI2</i><br><b>MCS = 67.7</b>                         | No cluster<br><b>MCS = 61.5</b>                                  | <i>C10orf18, GDI2, FBXO18</i>           | Yes             |
|                 | <i>KIN</i>                                         | <i>KIN, ATP5C1, TAF3</i><br><b>MCS = 64.9</b>                      | <i>KIN, ATP5C1</i><br><b>MCS = 55.1</b>                          | <i>KIN, ATP5C1</i>                      | Yes             |
| <i>USP6NL</i>   | <i>USP6NL, ECHDC3, C10orf47</i><br><b>MCS = 61</b> | No cluster<br><b>MCS = 55.9</b>                                    | <i>USP6NL, ECHDC3</i>                                            | Yes                                     |                 |
| 12p13.33-p13.31 | <i>CCDC77</i>                                      | <i>KDM5A, CCDC77</i><br><b>MCS = 83.6</b>                          | <i>KDM5A, CCDC77</i><br><b>MCS = 73.3</b>                        | <i>KDM5A, CCDC77, B4GALNT3</i>          | Yes             |
|                 | <i>NINJ2</i>                                       | <i>NINJ2, LOC100049716</i><br><b>MCS = 71.3</b>                    | No cluster<br><b>MCS = 63.8</b>                                  | <i>NINJ2, LOC100049716, WNK1</i>        | Yes             |
|                 | <i>WNT5B</i>                                       | No cluster                                                         | No cluster                                                       | <i>FBXL14, WNT5B</i>                    | No              |
|                 | <i>FOXMI</i>                                       | <i>FOXMI, C12orf32, TULP3, TEAD4</i><br><b>MCS = 61.7</b>          | <i>FOXMI, C12orf32</i><br><b>MCS = 54.4</b>                      | <i>FOXMI, C12orf32, TULP3, TEAD4</i>    | Yes             |
|                 | <i>C12orf4</i>                                     | <i>C12orf4, RAD51API, DYRK4</i><br><b>MCS = 62.9</b>               | <i>C12orf4, RAD51API</i><br><b>MCS = 54.3</b>                    | <i>C12orf4, RAD51API, DYRK4</i>         | Yes             |
|                 | <i>NDUFA9</i>                                      | No cluster                                                         | No cluster                                                       | No cluster                              | No              |
| 13q31.3-q34     | <i>DZIP1</i>                                       | No cluster                                                         | No cluster                                                       | No cluster                              | No              |
|                 | <i>RAP2A</i>                                       | <i>MBNL2, RAP2A, IPO5</i><br><b>MCS = 61.3</b>                     | <i>RAP2A, IPO5</i><br><b>MCS = 56.6</b>                          | <i>MBNL2, RAP2A, IPO5, FARP1, STK24</i> | Yes             |
|                 | <i>TNFSF13B</i>                                    | <i>TNFSF13B, SP3P</i>                                              | No cluster                                                       | No cluster                              | Yes             |



|              |                 |                                                                            |                                                                            |                                             |            |
|--------------|-----------------|----------------------------------------------------------------------------|----------------------------------------------------------------------------|---------------------------------------------|------------|
|              |                 | <b>MCS = 64.8</b>                                                          |                                                                            |                                             |            |
|              | <i>ANKRD10</i>  | <i>CARKD, CARS2, INGI, ANKRD10, ARHGEF7, C13orf16</i><br><b>MCS = 50.6</b> | <i>CARKD, CARS2, INGI, ANKRD10, ARHGEF7, C13orf16</i><br><b>MCS = 50.8</b> | <i>CARKD, CARS2, INGI, ANKRD10, ARHGEF7</i> | Discordant |
|              | <i>GPR180</i>   | <i>TGDS, GPR180</i><br><b>MCS = 67.6</b>                                   | <i>TGDS, GPR180</i><br><b>MCS = 74.8</b>                                   | <i>TGDS, GPR180</i>                         | Discordant |
|              | <i>CLYBL</i>    | No cluster<br><b>MCS = 60.2</b>                                            | <i>TM9SF2, CLYBL</i><br><b>MCS = 67.6</b>                                  | Discontinuous                               | Discordant |
| 18q12.1-12.2 | <i>DSC2</i>     | <i>DSC3, DSC2</i><br><b>MCS = 73</b>                                       | <i>DSC3, DSC2</i><br><b>MCS = 66.5</b>                                     | <i>DSC3, DCS2</i>                           | Yes        |
|              | <i>DSG2</i>     | <i>DSG3, DSG2</i><br><b>MCS = 66.1</b>                                     | No cluster<br><b>MCS = 60.8</b>                                            | <i>DSG3, DSG2</i>                           | Yes        |
|              | <i>RNF138</i>   | No cluster                                                                 | No cluster                                                                 | No cluster                                  | No         |
|              | <i>MAPRE2</i>   | No cluster                                                                 | No cluster                                                                 | No cluster                                  | No         |
| 18q21.33-q23 | <i>SERPINB5</i> | No cluster                                                                 | No cluster                                                                 | No cluster                                  | No         |
|              | <i>MBP</i>      | No cluster                                                                 | No cluster                                                                 | No cluster                                  | No         |
|              | <i>NFATC1</i>   | No cluster<br><b>MCS = 60.6</b>                                            | <i>ATP9B, NFATC1</i><br><b>MCS = 65.6</b>                                  | No cluster                                  | Discordant |
|              | <i>CDH19</i>    | No cluster                                                                 | No cluster                                                                 | No cluster                                  | No         |
|              | <i>PQLC1</i>    | <i>PQLC1, FLJ37638</i><br><b>MCS = 74.6</b>                                | <i>PQLC1, FLJ37638</i><br><b>MCS = 73.4</b>                                | Discontinuous                               | Yes        |
| 21q22.3      | <i>WDR4</i>     | No cluster                                                                 | No cluster                                                                 | No cluster                                  | No         |
|              | <i>CBS</i>      | <i>CBS, U2AF1</i><br><b>MCS = 67.1</b>                                     | No cluster<br><b>MCS = 61.8</b>                                            | <i>CBS, U2AF1</i>                           | Yes        |
|              | <i>PDXK</i>     | <i>RRP1B, PDXK, CSTB, RRP1</i><br><b>MCS = 62.6</b>                        | <i>RRP1B, PDXK</i><br><b>MCS = 50.9</b>                                    | <i>RRP1B, PDXK, CSTB, RRP1</i>              | Yes        |
|              | <i>C21orf70</i> | No cluster                                                                 | No cluster                                                                 | No cluster                                  | No         |
|              | <i>SI00B</i>    | No cluster                                                                 | No cluster                                                                 | <i>SI00B, PRMT2</i>                         | No         |
|              | <i>TMPRSS3</i>  | No cluster                                                                 | No cluster                                                                 | No cluster                                  | No         |
|              | <i>PDE9A</i>    | No cluster                                                                 | No cluster                                                                 | No cluster                                  | No         |
|              | <i>AGPAT3</i>   | No cluster                                                                 | No cluster                                                                 | <i>RRP1, AGPAT3</i>                         | No         |
|              | <i>SUMO3</i>    | <i>UBE2G2, SUMO3</i><br><b>MCS = 66.2</b>                                  | <i>UBE2G2, SUMO3</i><br><b>(MCS = 65.7)</b>                                | <i>UBE2G2, SUMO3, PTTG1IP</i>               | Yes        |
|              | <i>SUMO3</i>    | <i>SUMO3, PTTG1IP</i><br><b>MCS = 75.1</b>                                 | <i>SUMO3, PTTG1IP</i><br><b>MCS = 73.2</b>                                 | <i>UBE2G2, SUMO3, PTTG1IP</i>               | Yes        |

a: oestrogen receptor; b: multi-correlation score

Supplementary Figure 1: Level of expression genes belonging to *ESR1* cluster (*RMND1*, *C6orf211*, *C6orf97*, *ESR1*) in breast cancer patients according to oestrogen receptor (ER) status, based on bcGenExMiner v3.0 data.

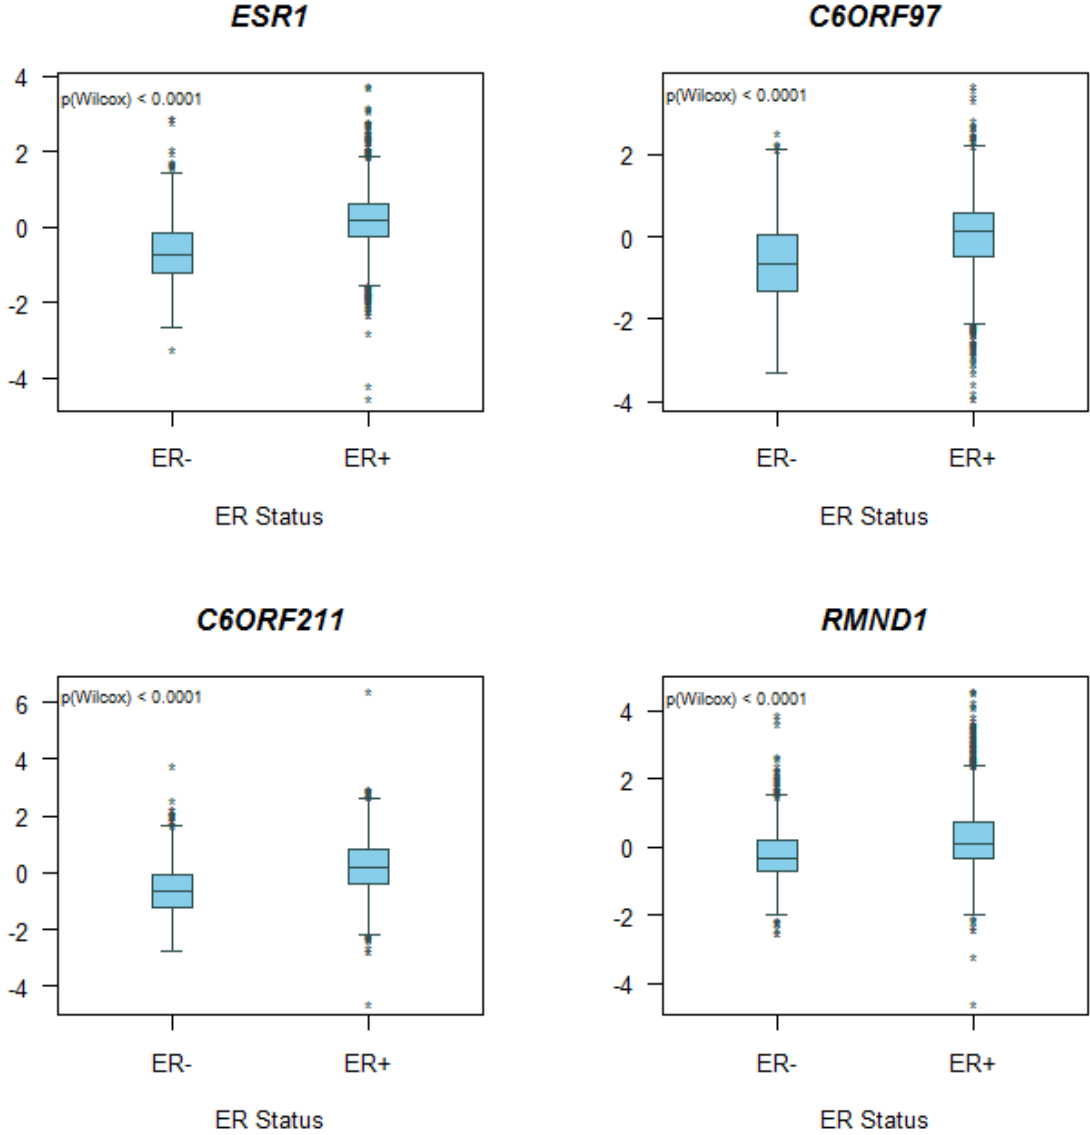

Supplement: supp_bas060_Jzquel_Supp_data.pdf [file supp_bas060_Jzquel_Supp_data.pdf]
